# Supplementary material
Source: PubMed Central journal article supplement (PMC3554447)
Supplement: hdy201280x1.pdf [file hdy201280x1.pdf]

## Online Supplementary material

# The effects of inheritance in tetraploids on genetic diversity and population divergence

Patrick G. Meirmans & Peter H. Van Tienderen

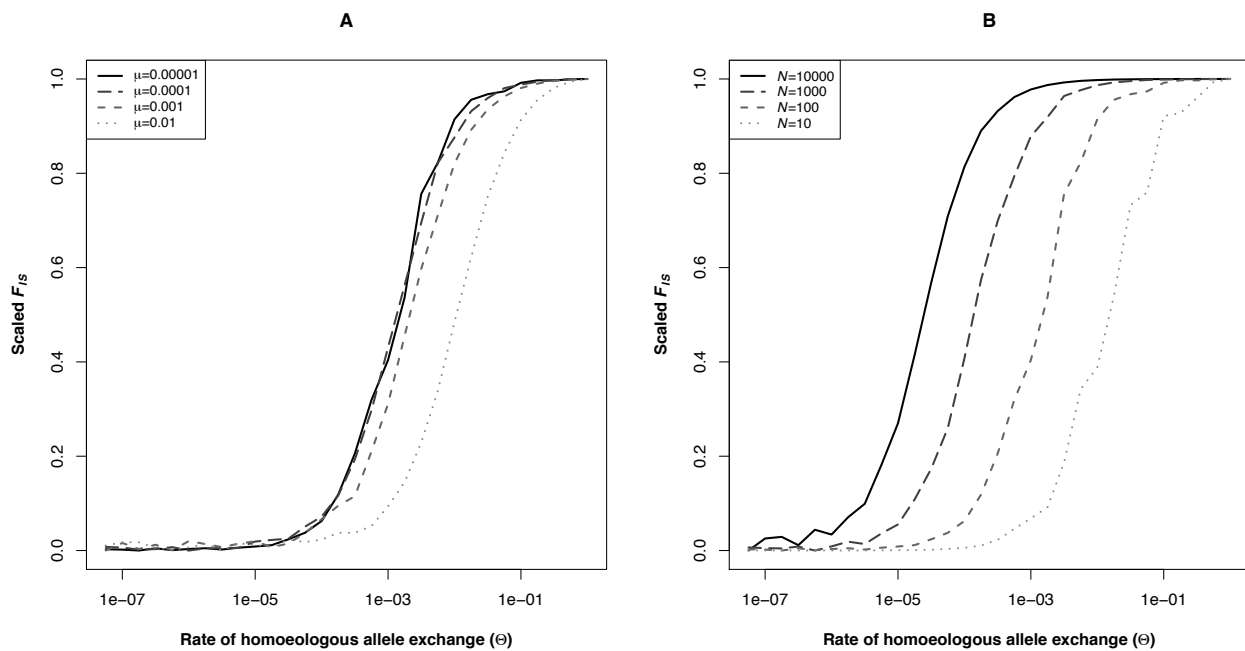

*Fig. S1.* The effect of the rate of homoeologous allele exchange,  $\Theta$ , on the inbreeding coefficient  $F_{IS}$ ; A) for different values of the mutation rate, keeping the population size fixed at  $N=100$ ; B) for different population sizes, keeping the mutation rate fixed at 0.00001. Other parameters:  $m=0$ , 1000 loci. Note that the values of  $F_{IS}$  have been scaled from zero to one per series to ease comparison (see Fig. 3 for the unscaled versions).

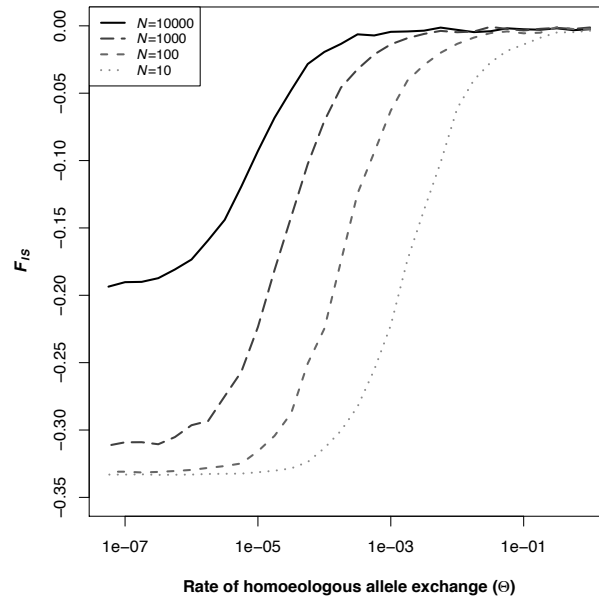

*Fig. S2.* Coalescent simulations of the effect of the rate of tetrasomy on the inbreeding coefficient  $F_{IS}$  for different population sizes. Simulations were performed using the program MS (Hudson, 2002). A single tetraploid population consisting of two subgenomes was modelled in MS as two diploid populations; migration between the two diploid populations was then used as a proxy for tetrasomy events in the tetraploid population. Other parameters:  $m=0$ , 1000 loci,  $\mu=0.00001$ . See Fig. 3 for similar results from our own frequency-based simulation model.
